# Supplementary material for: Cognitive function in early and later life is associated with blood glucose in older individuals: analysis of the Lothian Birth Cohort of 1936
Source: Springer Nature journal article supplement (doi:10.1007/s00125-018-4645-8), 2018-06-02
Supplement: MOESM1 [file 15814006]

## ESM Results

### *HbA<sub>1c</sub> and cognitive function change between ages 11 and 70*

Age 11 cognitive function typically explains approximately 50% of the variation in age 70 cognitive function, as assessed by the Moray House Test, which was given to all participants at age 70 to allow for direct comparisons with age 11 cognitive function. This correlation leaves room for significant cognitive change to have occurred prior to age 70. To directly test whether change in cognitive function that occurred between age 11 and age 70 was associated with HbA<sub>1c</sub> at age 70, we fit a series of linear regression models. We tested if the difference between age 70 and age 11 cognitive function predicted HbA<sub>1c</sub> levels. Although age 11 cognitive function significantly predicted HbA<sub>1c</sub> at age 70 ( $\beta < -0.06$ ,  $\rho^2 > 0.003$ ,  $p < 0.001$ ), change in cognitive function did not, regardless of which control variables were included (ESM Table 5).

**ESM Table 1.** Descriptive statistics for cognitive, demographic, and clinical variables for only individuals who completed all waves.

|                                  | Wave 1        |               | Wave 2       |               | Wave 3        |               |
|----------------------------------|---------------|---------------|--------------|---------------|---------------|---------------|
|                                  | T2D           | No T2D        | T2D          | No T2D        | T2D           | No T2D        |
| Female                           | 9 (1.6%)      | 266 (48.5%)   | 15 (2.73%)   | 260 (47.4%)   | 21 (3.83%)    | 246 (44.9%)   |
| Ever a smoker                    | 19 (3.5%)     | 234 (42.7%)   | 22 (4.01%)   | 231 (42.2%)   | 33 (6.02%)    | 217 (39.6%)   |
| Ever had CVD                     | 11 (2.0 %)    | 114 (20.8%)   | 16 (2.92%)   | 139 (25.4%)   | 22 (4.01%)    | 163 (29.7%)   |
| Ever had high BP                 | 19 (3.5%)     | 176 (32.1%)   | 29 (5.29%)   | 229 (41.8%)   | 43 (7.85%)    | 243 (44.3%)   |
| BMI                              | 29.6 (4.55)   | 27.4 (4.21)   | 29.2 (5.13)  | 27.6 (4.30)   | 29.5 (4.98)   | 27.5 (4.32)   |
| HbA <sub>1c</sub> (mmol/mol)     | 56.9 (13.0)   | 39.7 (5.0)    | 51.9 (8.89)  | 37.8 (4.39)   | 53.8 (9.34)   | 39.2 (4.52)   |
| HbA <sub>1c</sub> (%)            | 7.4 (3.3)     | 5.8 (2.6)     | 6.9 (3.0)    | 5.6 (2.6)     | 7.1 (3.0)     | 5.7 (2.6)     |
| Years of education               | 10.3 (1.00)   | 10.9 (1.18)   | 10.3 (0.99)  | 10.9 (1.18)   | 10.4 (1.04)   | 10.9 (1.18)   |
| Age 11 cognitive function        | 96 (19.4)     | 102 (15.0)    | 97.8 (18.3)  | 102 (15.0)    | 97.5 (16.8)   | 103 (14.9)    |
| Matrix Reasoning <sup>a</sup>    | 12.7 (5.30)   | 14.5 (5.00)   | 13.3 (4.41)  | 13.9 (4.94)   | 12.3 (4.81)   | 13.4 (4.91)   |
| Block Design <sup>a</sup>        | 33.3 (9.66)   | 35.7 (10.2)   | 32.7 (8.18)  | 34.8 (10.2)   | 31 (8.45)     | 32.9 (9.92)   |
| Spatial Span <sup>a</sup>        | 7.5 (1.61)    | 7.67 (1.41)   | 6.95 (1.82)  | 7.15 (1.56)   | 6.79 (1.76)   | 7.19 (1.55)   |
| NART <sup>b</sup>                | 33.8 (8.91)   | 35.6 (7.98)   | 34.2 (7.88)  | 35.2 (8.05)   | 33.9 (8.68)   | 35.8 (7.85)   |
| WTAR <sup>b</sup>                | 38.8 (9.40)   | 42 (6.82)     | 40.2 (6.31)  | 41.8 (6.71)   | 39.7 (7.91)   | 41.8 (6.78)   |
| Verbal Fluency <sup>b</sup>      | 45.6 (15.4)   | 43.4 (12.6)   | 43.8 (13.1)  | 44.3 (12.9)   | 42.7 (13.1)   | 43.9 (12.7)   |
| Logical Memory <sup>c</sup>      | 67.5 (22.8)   | 74.5 (16.4)   | 70.2 (23.4)  | 76.6 (16.3)   | 73.9 (20.8)   | 76 (18.2)     |
| VPA <sup>c</sup>                 | 25.4 (9.40)   | 28 (8.47)     | 27.3 (9.37)  | 28.4 (9.09)   | 26.2 (8.69)   | 27.4 (9.31)   |
| Digit Span <sup>c</sup>          | 7.83 (2.97)   | 8.03 (2.32)   | 7.95 (2.14)  | 8.01 (2.34)   | 7.44 (2.55)   | 7.96 (2.39)   |
| LNS <sup>c</sup>                 | 11.3 (3.52)   | 11.4 (3.09)   | 11.2 (2.79)  | 11.4 (3.11)   | 10 (2.98)     | 10.8 (2.97)   |
| Symbol Search <sup>d</sup>       | 23.3 (8.40)   | 25.8 (6.41)   | 24.2 (5.91)  | 25.6 (5.90)   | 24.6 (5.66)   | 25.3 (6.33)   |
| Digit-Symbol Coding <sup>d</sup> | 53.3 (12.8)   | 59.2 (12.3)   | 54.4 (13.1)  | 58.6 (11.8)   | 51.5 (13.5)   | 55.9 (12.0)   |
| Inspection Time <sup>d</sup>     | 111 (7.88)    | 114 (10.6)    | 110 (9.81)   | 112 (11.8)    | 110 (11.7)    | 111 (11.9)    |
| Reaction Time <sup>d</sup>       | 0.669 (0.119) | 0.625 (0.075) | 0.66 (0.094) | 0.635 (0.081) | 0.678 (0.095) | 0.668 (0.095) |
| MMSE                             | 28.4 (1.94)   | 29 (1.25)     | 28.6 (1.62)  | 28.9 (1.21)   | 28.2 (1.82)   | 28.9 (1.48)   |

CVD, cardiovascular disease; BP, blood pressure; NART, National Adult Reading Test; WTAR, Wechsler Test of Adult Reading; VPA, Visual Paired Associates; LNS, Letter-Number Sequencing; MMSE, Mini-Mental State Examination; T2D, individuals with type 2 diabetes; T2D was defined as self-reported physician diagnosis of diabetes. <sup>a</sup> part of the visuospatial ability domain, <sup>b</sup> part of the crystallized ability domain, <sup>c</sup> part of the memory domain, <sup>d</sup> part of the processing speed domain.

**ESM Table 2.** FDR corrected, standardized parameter estimates, standard errors, and p-values for LGCMs of HbA<sub>1c</sub> and cognitive function.

| Path                                                   | Model A  |      |          | Model B  |      |          | Model C  |      |          |
|--------------------------------------------------------|----------|------|----------|----------|------|----------|----------|------|----------|
|                                                        | Estimate | SE   | <i>p</i> | Estimate | SE   | <i>p</i> | Estimate | SE   | <i>p</i> |
| Tested relationships                                   |          |      |          |          |      |          |          |      |          |
| HbA <sub>1c</sub> level ~ HbA <sub>1c</sub> slope      | .002     | .008 | .822     | -.002    | .008 | .849     | -.001    | .008 | .880     |
| HbA <sub>1c</sub> level ~ Cognitive Function level     | .080     | .012 | < .001   | .004     | .012 | .762     | -.033    | .012 | .008     |
| HbA <sub>1c</sub> level ~ Cognitive Function level (v) | -.128    | .011 | < .001   | -.040    | .011 | < .001   | -.009    | .011 | .446     |
| HbA <sub>1c</sub> level ~ Cognitive Function level (s) | -.148    | .014 | < .001   | -.049    | .013 | < .001   | -.007    | .012 | .614     |
| HbA <sub>1c</sub> level ~ Cognitive Function level (m) | -.053    | .011 | < .001   | -.003    | .010 | .797     | .019     | .010 | .068     |
| HbA <sub>1c</sub> level ~ Cognitive Function level (c) | -.059    | .020 | .004     | -.028    | .019 | .165     | .005     | .018 | .826     |
| HbA <sub>1c</sub> slope ~ Cognitive Function slope     | .008     | .001 | < .001   | .000     | .000 | < .001   | .002     | .000 | < .001   |
| HbA <sub>1c</sub> slope ~ Cognitive Function slope (v) | -.008    | .001 | < .001   | -.001    | .000 | < .001   | -.002    | .000 | < .001   |
| HbA <sub>1c</sub> slope ~ Cognitive Function slope (s) | -.015    | .001 | < .001   | -.001    | .000 | < .001   | -.003    | .000 | < .001   |
| HbA <sub>1c</sub> slope ~ Cognitive Function slope (m) | -.020    | .001 | < .001   | -.002    | .000 | < .001   | -.005    | .000 | < .001   |
| HbA <sub>1c</sub> slope ~ Cognitive Function slope (c) | -.004    | .001 | < .001   | .000     | .000 | < .001   | -.001    | .000 | < .001   |
| Cognitive Function level ~ Cognitive Function slope    | .002     | .001 | < .001   | .002     | .000 | < .001   | .002     | .000 | < .001   |
| HbA <sub>1c</sub> level ~ Cognitive Function slope     | .018     | .002 | < .001   | -.009    | .001 | < .001   | -.008    | .001 | < .001   |
| HbA <sub>1c</sub> level ~ Cognitive Function slope (v) | -.017    | .002 | < .001   | .010     | .002 | < .001   | .009     | .001 | < .001   |
| HbA <sub>1c</sub> level ~ Cognitive Function slope (s) | -.039    | .003 | < .001   | .016     | .002 | < .001   | .015     | .002 | < .001   |
| HbA <sub>1c</sub> level ~ Cognitive Function slope (m) | -.047    | .003 | < .001   | .024     | .002 | < .001   | .022     | .001 | < .001   |
| HbA <sub>1c</sub> level ~ Cognitive Function slope (c) | -.010    | .002 | < .001   | .004     | .001 | < .001   | .004     | .001 | < .001   |
| HbA <sub>1c</sub> slope ~ Cognitive Function level     | -.166    | .005 | < .001   | -.013    | .001 | < .001   | -.004    | .001 | < .001   |
| HbA <sub>1c</sub> slope ~ Cognitive Function level (v) | .168     | .005 | < .001   | .014     | .001 | < .001   | .005     | .001 | < .001   |
| HbA <sub>1c</sub> slope ~ Cognitive Function level (s) | .180     | .008 | < .001   | .017     | .001 | < .001   | .006     | .001 | < .001   |
| HbA <sub>1c</sub> slope ~ Cognitive Function level (m) | .094     | .007 | < .001   | .006     | .001 | < .001   | .001     | .001 | .542     |
| HbA <sub>1c</sub> slope ~ Cognitive Function level (c) | .066     | .008 | < .001   | .007     | .002 | .001     | .003     | .002 | .235     |
| Cognitive Function slope ~ Age 11 Cognitive Function   | -.005    | .001 | < .001   | .012     | .002 | < .001   | -.001    | .001 | .235     |
| Cognitive Function level ~ Age 11 Cognitive Function   | .554     | .020 | < .001   | .424     | .019 | < .001   | .400     | .018 | < .001   |
| HbA <sub>1c</sub> slope ~ Age 11 Cognitive Function    | -.001    | .003 | .842     | -.003    | .003 | .488     | -.003    | .003 | .440     |
| HbA <sub>1c</sub> level ~ Age 11 Cognitive Function    | -.111    | .034 | .001     | -.095    | .033 | .005     | -.066    | .033 | .068     |

Untested controls

|                                      |       |      |       |      |       |      |
|--------------------------------------|-------|------|-------|------|-------|------|
| HbA <sub>1c</sub> ~ Age (wave 1)     | .082  | .029 | .079  | .029 | .080  | .028 |
| HbA <sub>1c</sub> ~ Age (wave 2)     | -.040 | .024 | -.037 | .024 | -.040 | .023 |
| HbA <sub>1c</sub> ~ Age (wave 3)     | -.086 | .027 | -.088 | .026 | -.087 | .026 |
| HbA <sub>1c</sub> ~ Age (wave 4)     | -.047 | .034 | .039  | .034 | .043  | .033 |
| HbA <sub>1c</sub> ~ High BP (wave 1) |       |      | .154  | .049 | .119  | .047 |
| HbA <sub>1c</sub> ~ High BP (wave 2) |       |      | .065  | .036 | .029  | .035 |
| HbA <sub>1c</sub> ~ High BP (wave 3) |       |      | .129  | .040 | .094  | .039 |
| HbA <sub>1c</sub> ~ High BP (wave 4) |       |      | .117  | .051 | .095  | .049 |
| HbA <sub>1c</sub> ~ CVD (wave 1)     |       |      | .110  | .110 | .104  | .056 |
| HbA <sub>1c</sub> ~ CVD (wave 2)     |       |      | .014  | .014 | .003  | .037 |
| HbA <sub>1c</sub> ~ CVD (wave 3)     |       |      | .135  | .135 | .124  | .040 |
| HbA <sub>1c</sub> ~ CVD (wave 4)     |       |      | .145  | .145 | .135  | .052 |
| HbA <sub>1c</sub> ~ BMI (wave 1)     |       |      |       |      | .244  | .031 |
| HbA <sub>1c</sub> ~ BMI (wave 2)     |       |      |       |      | .264  | .024 |
| HbA <sub>1c</sub> ~ BMI (wave 3)     |       |      |       |      | .279  | .027 |
| HbA <sub>1c</sub> ~ BMI (wave 4)     |       |      |       |      | .268  | .032 |

---

Notation follows Lavaan syntax for path definitions: two tildes (~~) indicates a residual correlation between variables, and one tilde (~) indicates a regression path from the right-hand side to the left-hand side of the tilde. Among the tested relationships, lowercase parenthetical suffixes indicate the subdomains: v, visuospatial; s, processing speed; m, memory; c, crystallized. Untested controls present the regression effects of each variable from a given wave on the HbA<sub>1c</sub> measurement at that wave. Model A includes age, sex, age 11 cognitive function, and years of education. Model B includes these covariates, plus high blood pressure (BP) history, cardiovascular disease (CVD) history, *APOE\*ε4*, and smoking history. Model C includes all previously mentioned covariates and BMI (Body Mass Index).

**ESM Table 3.** Fit statistics of LGCMs presented in Figure 3 and Table S2.

| Covariates                                                 | $\chi^2$ | df   | RMSEA | SRMR | CFI  | TLI  |
|------------------------------------------------------------|----------|------|-------|------|------|------|
| Age, sex, age 11 cognitive function, education             | 4972.5   | 2335 | .032  | .061 | .939 | .936 |
| + High BP, CVD, smoking history, <i>APOE*</i> $\epsilon 4$ | 5462.0   | 2943 | .028  | .056 | .942 | .939 |
| + BMI                                                      | 5739.3   | 3195 | .027  | .055 | .942 | .939 |

RMSEA = Root Mean Squared Error of Approximation, SRMR = Standardized Root Mean Square Residual, CFI = Comparative Fit Index, TLI = Tucker-Lewis Index.

**ESM Table 4.** FDR corrected, standardized parameter estimates, standard errors, and p-values for tested relationships in LGCMs of HbA<sub>1c</sub> and cognitive function, excluding individuals with a diabetes diagnosis.

| Path                                                   | Model A  |      |          | Model B  |      |          | Model C  |      |          |
|--------------------------------------------------------|----------|------|----------|----------|------|----------|----------|------|----------|
|                                                        | Estimate | SE   | <i>p</i> | Estimate | SE   | <i>p</i> | Estimate | SE   | <i>p</i> |
| HbA <sub>1c</sub> level ~ HbA <sub>1c</sub> slope      | .003     | .002 | 0.194    | -.003    | .002 | 0.193    | -.003    | .002 | 0.171    |
| HbA <sub>1c</sub> level ~ Cognitive Function level     | -.044    | .008 | < .001   | -.110    | .008 | < .001   | -.066    | .008 | < .001   |
| HbA <sub>1c</sub> level ~ Cognitive Function level (v) | .028     | .009 | 0.002    | .103     | .009 | < .001   | .078     | .009 | < .001   |
| HbA <sub>1c</sub> level ~ Cognitive Function level (s) | .024     | .009 | 0.010    | .108     | .010 | < .001   | .079     | .009 | < .001   |
| HbA <sub>1c</sub> level ~ Cognitive Function level (m) | .016     | .007 | 0.020    | .061     | .008 | < .001   | .043     | .007 | < .001   |
| HbA <sub>1c</sub> level ~ Cognitive Function level (c) | .011     | .014 | 0.428    | .040     | .014 | 0.005    | .023     | .014 | 0.098    |
| HbA <sub>1c</sub> slope ~ Cognitive Function slope     | .014     | .002 | < .001   | -.032    | .004 | < .001   | .010     | .001 | < .001   |
| HbA <sub>1c</sub> slope ~ Cognitive Function slope (v) | -.014    | .002 | < .001   | .032     | .004 | < .001   | -.010    | .001 | < .001   |
| HbA <sub>1c</sub> slope ~ Cognitive Function slope (s) | -.029    | .002 | < .001   | .069     | .005 | < .001   | -.020    | .002 | < .001   |
| HbA <sub>1c</sub> slope ~ Cognitive Function slope (m) | -.038    | .002 | < .001   | .088     | .005 | < .001   | -.026    | .001 | < .001   |
| HbA <sub>1c</sub> slope ~ Cognitive Function slope (c) | -.007    | .001 | < .001   | .017     | .003 | < .001   | -.005    | .001 | < .001   |
| Cognitive Function level ~ Cognitive Function slope    | .003     | .001 | < .001   | .002     | .000 | < .001   | .002     | .000 | < .001   |
| HbA <sub>1c</sub> level ~ Cognitive Function slope     | -.004    | .001 | < .001   | -.027    | .003 | < .001   | -.002    | .001 | 0.002    |
| HbA <sub>1c</sub> level ~ Cognitive Function slope (v) | .003     | .001 | < .001   | .027     | .003 | < .001   | .001     | .001 | 0.075    |
| HbA <sub>1c</sub> level ~ Cognitive Function slope (s) | .006     | .001 | < .001   | .056     | .004 | < .001   | .002     | .001 | 0.007    |
| HbA <sub>1c</sub> level ~ Cognitive Function slope (m) | .010     | .001 | < .001   | .075     | .004 | < .001   | .006     | .001 | < .001   |
| HbA <sub>1c</sub> level ~ Cognitive Function slope (c) | .001     | .000 | 0.019    | .014     | .002 | < .001   | .000     | .000 | 0.758    |
| HbA <sub>1c</sub> slope ~ Cognitive Function level     | -.079    | .002 | < .001   | -2.570   | .070 | < .001   | -.056    | .002 | < .001   |
| HbA <sub>1c</sub> slope ~ Cognitive Function level (v) | .076     | .002 | < .001   | 2.572    | .070 | < .001   | .055     | .002 | < .001   |
| HbA <sub>1c</sub> slope ~ Cognitive Function level (s) | .080     | .004 | < .001   | 2.717    | .126 | < .001   | .057     | .003 | < .001   |
| HbA <sub>1c</sub> slope ~ Cognitive Function level (m) | .045     | .003 | < .001   | 1.532    | .103 | < .001   | .033     | .002 | < .001   |
| HbA <sub>1c</sub> slope ~ Cognitive Function level (c) | .029     | .004 | < .001   | 1.079    | .127 | < .001   | .022     | .003 | < .001   |
| Cognitive Function slope ~ Age 11 Cognitive Function   | -.047    | .006 | < .001   | .054     | .007 | < .001   | .006     | .001 | < .001   |
| Cognitive Function level ~ Age 11 Cognitive Function   | .556     | .021 | < .001   | .379     | .018 | < .001   | .439     | .019 | < .001   |
| HbA <sub>1c</sub> slope ~ Age 11 Cognitive Function    | -.002    | .002 | 0.334    | .001     | .002 | 0.816    | -.001    | .002 | 0.685    |
| HbA <sub>1c</sub> level ~ Age 11 Cognitive Function    | -.057    | .022 | 0.013    | -.050    | .022 | 0.026    | .032     | .022 | 0.154    |

---

Notation follows Lavaan syntax for path definitions: two tildes (~~) indicates a residual correlation between variables, and one tilde (~) indicates a regression path from the right-hand side to the left-hand side of the tilde. Among the tested relationships, lowercase parenthetical suffixes indicate the subdomains: v, visuospatial; s, processing speed; m, memory; c, crystallized. Untested controls present the regression effects of each variable from a given wave on the HbA<sub>1c</sub> measurement at that wave. Model A includes age, sex, age 11 cognitive function, and years of education; the HbA<sub>1c</sub> level latent variable has been reflected to maintain consistency with Table S2. Model B includes these covariates, plus high blood pressure (BP) history, cardiovascular disease (CVD) history, *APOE*\*  $\epsilon 4$ , and smoking history. Model C includes all previously mentioned covariates and BMI (Body Mass Index); the HbA<sub>1c</sub> level, slope, and cognitive function slope latent variables have been reflected to maintain consistency with Table S2.



**ESM Table 5.** Linear modelling predictors of age 70 HbA<sub>1c</sub>

| Predictor                                  | Estimate | SE    | p     | Estimate | SE    | p       | Estimate | SE    | p       |
|--------------------------------------------|----------|-------|-------|----------|-------|---------|----------|-------|---------|
| Cognitive function change,<br>age 11 to 70 | -0.222   | 0.250 | 0.373 | -0.221   | 0.248 | 0.374   | -0.137   | 0.247 | 0.579   |
| Age 11 cognitive function                  |          |       |       | -0.064   | 0.017 | < 0.001 | -0.055   | 0.017 | 0.001   |
| Sex                                        |          |       |       |          |       |         | 0.540    | 0.502 | 0.282   |
| <i>APOE</i> * $\epsilon$ 4 allele          |          |       |       |          |       |         | -0.670   | 0.540 | 0.215   |
| Former smoker                              |          |       |       |          |       |         | 0.665    | 0.531 | 0.210   |
| Current smoker                             |          |       |       |          |       |         | 1.886    | 0.822 | 0.022   |
| Hypertension history                       |          |       |       |          |       |         | 2.246    | 0.520 | < 0.001 |
| CVD history                                |          |       |       |          |       |         | 1.809    | 0.597 | 0.003   |

**ESM Table 6.** ANCOVAs of HbA<sub>1c</sub> measurements, predicted by type 2 diabetes diagnosis, study wave, and overall cognitive function.

| Predictor                        | Sum of squares | p       | $\omega^2$ | Sum of squares | p       | $\omega^2$ |
|----------------------------------|----------------|---------|------------|----------------|---------|------------|
| T2D                              | 640.263        | < 0.001 | 0.338      | 611.006        | < 0.001 | 0.338      |
| CF                               | 8.541          | < 0.001 | 0.004      | 8.914          | < 0.001 | 0.005      |
| Wave                             | 45.104         | < 0.001 | 0.023      | 42.874         | < 0.001 | 0.023      |
| T2D:CF                           | 0.074          | 0.742   | 0.000      | 0.006          | 0.927   | 0.000      |
| T2D:Wave                         | 12.443         | < 0.001 | 0.006      | 11.601         | < 0.001 | 0.006      |
| CF:Wave                          | 2.408          | 0.059   | 0.001      | 2.269          | 0.067   | 0.001      |
| T2D:CF:Wave                      | 1.222          | 0.179   | 0.000      | 0.776          | 0.287   | 0.000      |
| Sex                              |                |         |            | 0.916          | 0.244   | 0.000      |
| CVD history                      |                |         |            | 3.394          | 0.025   | 0.002      |
| High BP history                  |                |         |            | 1.003          | 0.223   | 0.000      |
| Smoking history                  |                |         |            | 7.641          | 0.004   | 0.003      |
| <i>APOE*</i> $\epsilon$ 4 allele |                |         |            | 0.276          | 0.522   | 0.000      |

T2D = Type 2 diabetes diagnosis, CF = Overall cognitive function, CVD = cardiovascular disease, BP = blood pressure. Data used were from waves 1 and 2, and time point was captured in the categorical wave variable.

**ESM Table 7.** ANCOVAs of overall cognitive function scores, predicted by type 2 diabetes diagnosis, study wave, and HbA<sub>1c</sub>.

| Predictor                        | Sum of squares | p       | $\omega^2$ | Sum of squares | p       | $\omega^2$ |
|----------------------------------|----------------|---------|------------|----------------|---------|------------|
| T2D                              | 19.98          | < 0.001 | 0.014      | 18.98          | < 0.001 | 0.013      |
| HbA <sub>1c</sub>                | 9.48           | 0.001   | 0.006      | 9.91           | < 0.001 | 0.007      |
| Wave                             | 0.00           | 0.954   | -0.001     | 0.00           | 0.971   | -0.001     |
| T2D:HbA <sub>1c</sub>            | 1.99           | 0.112   | 0.001      | 1.07           | 0.241   | 0.000      |
| T2D:Wave                         | 0.62           | 0.375   | 0.000      | 0.52           | 0.414   | 0.000      |
| HbA <sub>1c</sub> :Wave          | 1.55           | 0.161   | 0.001      | 1.28           | 0.198   | 0.000      |
| T2D:HbA <sub>1c</sub> :Wave      | 1.54           | 0.162   | 0.001      | 1.63           | 0.147   | 0.001      |
| Sex                              |                |         |            | 0.02           | 0.878   | -0.001     |
| CVD history                      |                |         |            | 12.21          | < 0.001 | 0.008      |
| High BP history                  |                |         |            | 6.18           | 0.005   | 0.004      |
| Smoking history                  |                |         |            | 13.45          | < 0.001 | 0.009      |
| <i>APOE*</i> $\epsilon$ 4 allele |                |         |            | 3.12           | 0.045   | 0.002      |

T2D = Type 2 diabetes diagnosis, HbA<sub>1c</sub> = Glycated haemoglobin, CVD = cardiovascular disease, BP = blood pressure. Data used were from waves 1 and 2, and time point was captured in the categorical wave variable.
